# Supplementary material
Source: Frontiers journal article supplement (https://www.frontiersin.org/articles/526475)
Supplement: Data_Sheet_2.PDF [file Data_Sheet_2.PDF]

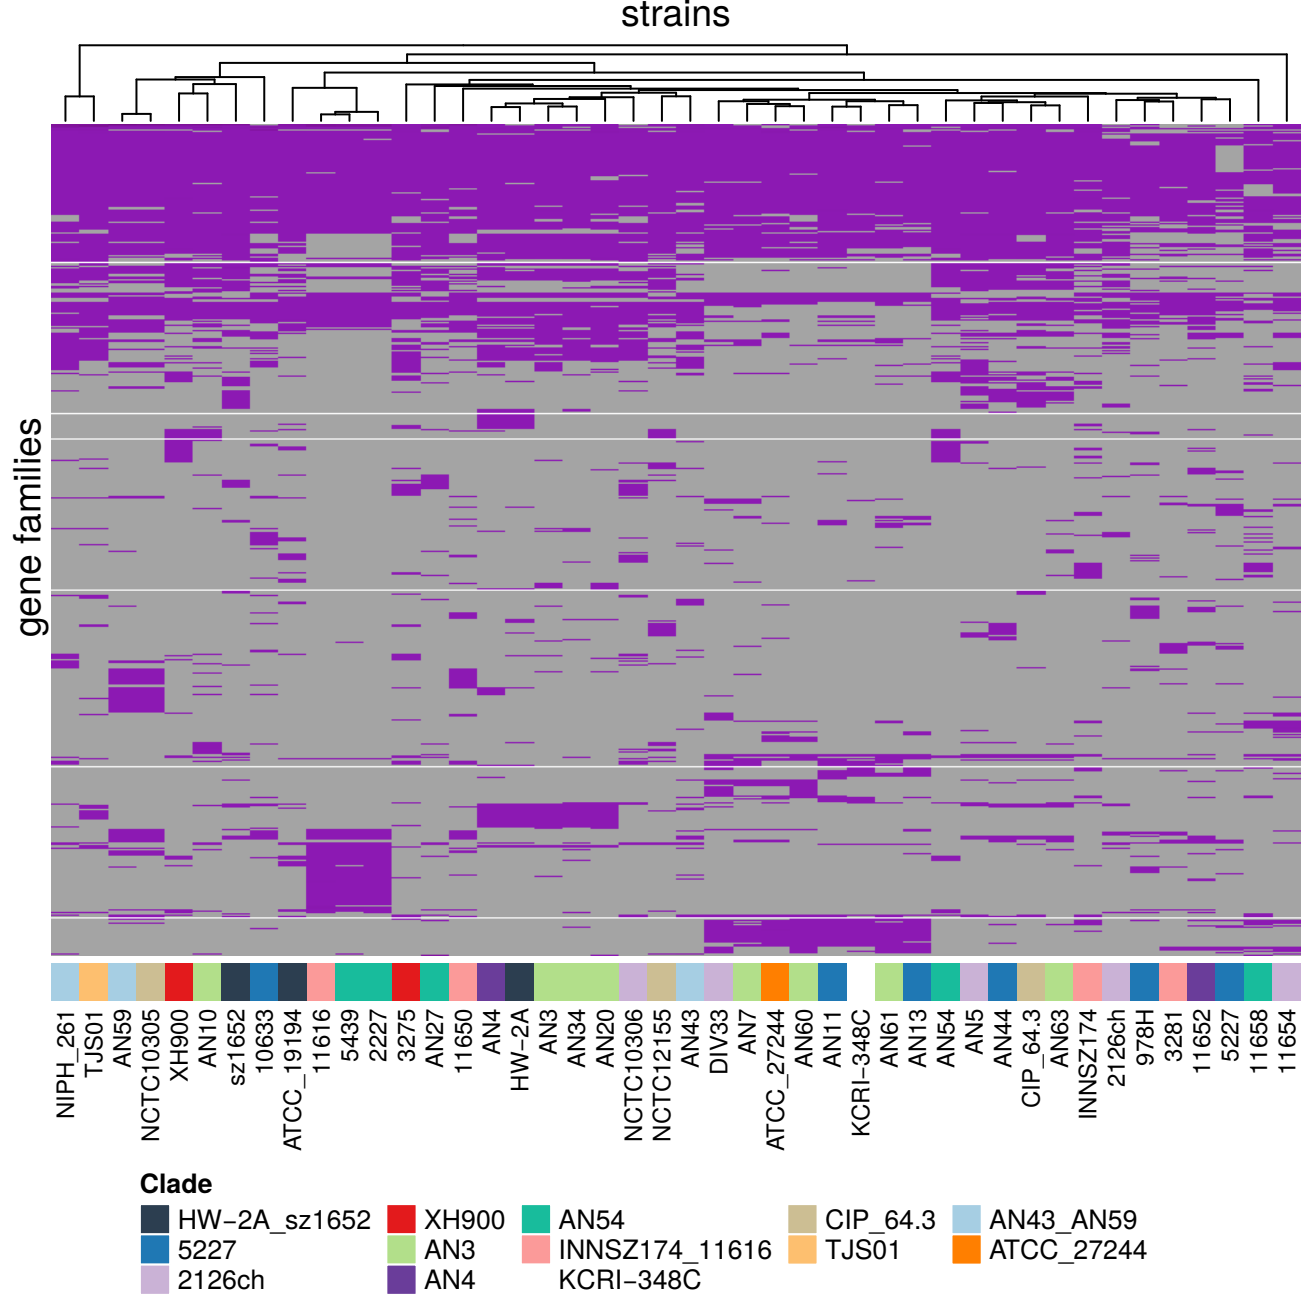

Supplementary Figure 2. Presence / absence matrix of non-core gene families.

Purple rows mean presence of a gene family, whereas gray squares reflect its absence; columns are strains and they are color-coded by clade. Only non-core gene families (excluding singletons) are depicted; paralogs are included in the same row.
